# Supplementary material
Source: HighWire-hosted journal article supplement (https://qdcxjkg.com/highwire/filestream/113096/field_highwire_adjunct_files/1/Online_data_supplement_Figure_S2.pdf)
Supplement: Online_data_supplement_Figure_S2.pdf [file Online_data_supplement_Figure_S2.pdf]

## Online data supplement Figure S2

Figure S2A shows the regression line (with 95% confidence intervals) drawn on a scatter diagram showing the relationship between reflex and voluntary cough flow rate for 17 stroke patients and 18 controls. This diagram includes those participants who did not produce voluntary or reflex coughs but does not include the 3 participants unable to tolerate tartaric acid administration. Voluntary cough flow rate increases by 1.2 l/min per 1 l/min increase in reflex cough flow rate, 95% CI 0.9 to 1.4 l/min,  $P < 0.001$ , adjusted  $R^2 = 0.736$ . Figure S2B shows patients and controls marked using different symbols, see key.

**Figure S2A**

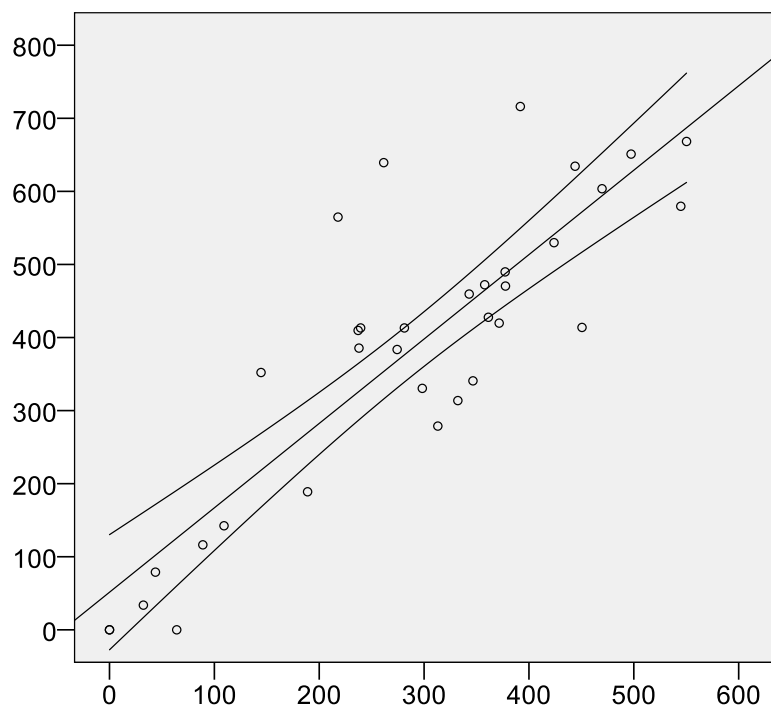

Reflex Cough Flow Rate (l/min)

**Figure S2B**

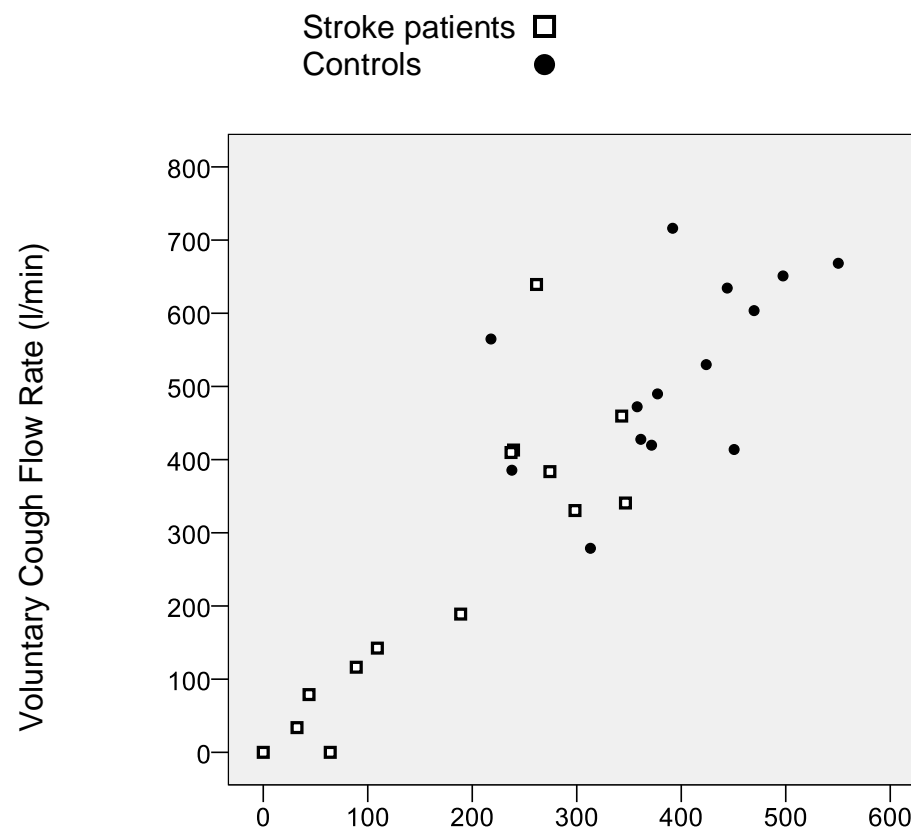

Reflex Cough Flow Rate (l/min)
